# Supplementary material
Source: PubMed Central journal article supplement (PMC2993361)
Supplement: 1009906107_pnas.201009906SI.pdf [file 1009906107_pnas.201009906SI.pdf]

# Supporting Information

Sharon et al. 10.1073/pnas.1009906107

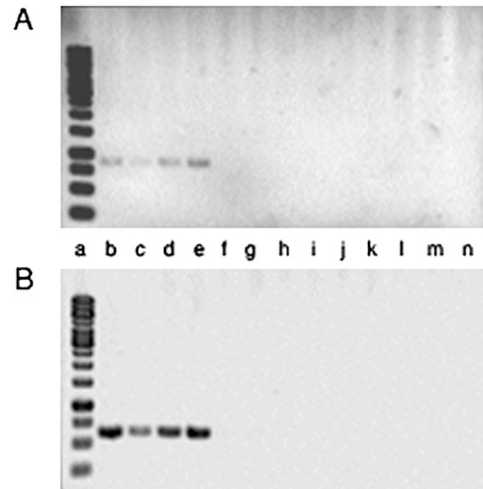

**Fig. S1.** PCR analysis for *Wolbachia*. Electrophoresis in 1% agarose of *Wolbachia*-specific 16S rRNA gene (A) and *wsp* gene PCR products (B). Lane a, Fermentas GeneRuler 1 kb DNA ladder (three shortest bands are 750 bp, 500 bp, and 250 bp); lanes b–e, male and female 20th-generation flies, reared on CMY (lanes b and c, CMY; lanes d and e, starch); lanes f–i, male and female 20th-generation flies, reared on CMY supplemented with a mixture of antibiotics (lanes f and g, CMY; lanes h and i, starch); lanes j–m, male and female 20th-generation flies, reared on CMY supplemented with their respective bacteria (infection experiment) after treatment with a mixture of antibiotics (lanes j and k, CMY; lanes l and m, starch).

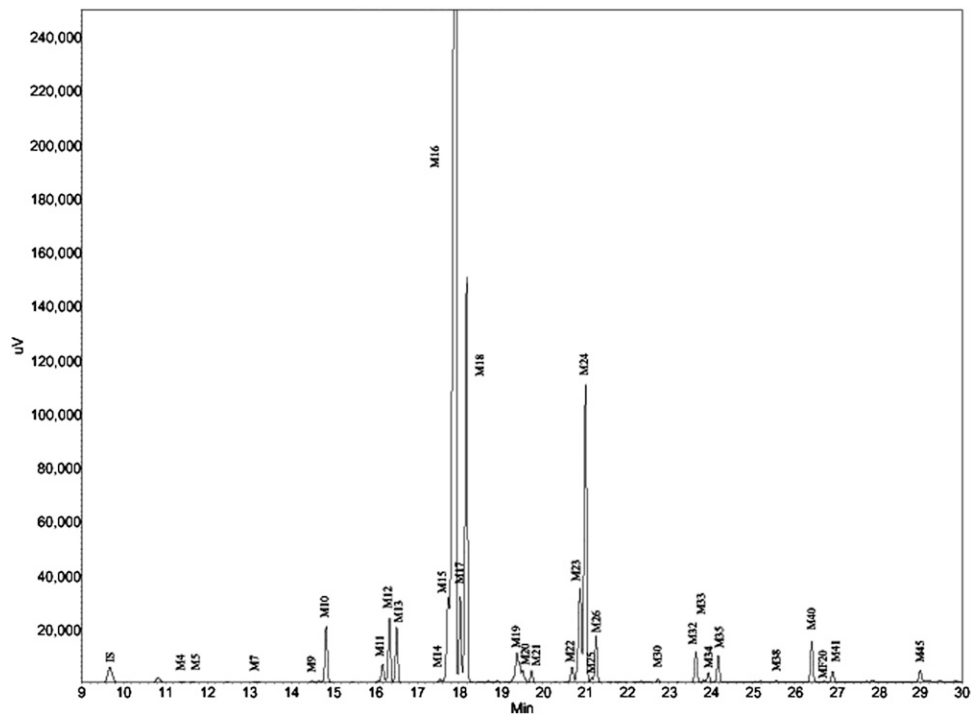

**Fig. S2.** GC-FID chromatogram of pentane-extracted CHs of CMY male flies ( $n = 10$ ). Peak annotations correspond to peak names in Table S1.

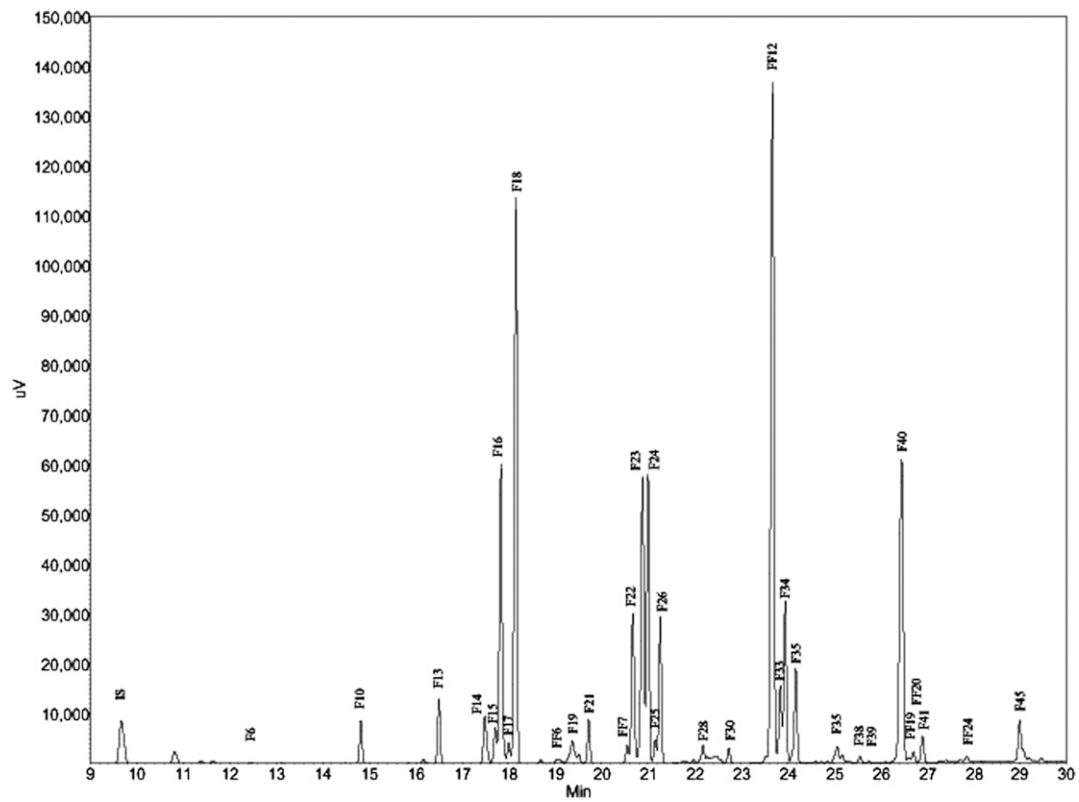

Fig. S3. GC-FID chromatogram of pentane-extracted CHs of CMY female flies ( $n = 9$ ). Peak annotations correspond to peak names in [Table S2](#).

**Table S1. CH profiles of untreated and antibiotic-treated CMY- and starch-bred male flies**

| Peak name    | Retention time (min) | Presumed compound*                | Mean CH per three flies $\pm$ SEM, ng |                         |                          |                         |
|--------------|----------------------|-----------------------------------|---------------------------------------|-------------------------|--------------------------|-------------------------|
|              |                      |                                   | No antibiotic treatment               |                         | Treated with antibiotics |                         |
|              |                      |                                   | CMY male ( $n = 3$ )                  | Starch male ( $n = 3$ ) | CMY male ( $n = 3$ )     | Starch male ( $n = 3$ ) |
| M1           | 4.36                 | —                                 | 16.0 $\pm$ 6.1                        | 21.8 $\pm$ 4.2          | 29.5 $\pm$ 3.4           | 42.9 $\pm$ 10.2         |
| M2           | 7.2                  | —                                 | 2.6 $\pm$ 1.4                         | 9.4 $\pm$ 2.8           | 1.8 $\pm$ 0.9            | 3.9 $\pm$ 1.5           |
| M3           | 8.12                 | —                                 | 6.7 $\pm$ 0.3                         | 7.0 $\pm$ 0.6           | 5.3 $\pm$ 0.3            | 7.0 $\pm$ 0.7           |
| IS           | 9.75                 | c-18 internal standard            | 100 $\pm$ 0.0                         | 100 $\pm$ 0.0           | 100 $\pm$ 0.0            | 100 $\pm$ 0.0           |
| M4           | 11.46                | —                                 | 2.1 $\pm$ 0.4                         | 3.1 $\pm$ 0.3           | ND                       | ND                      |
| M5           | 11.71                | —                                 | 3.3 $\pm$ 0.6                         | 3 $\pm$ 0.3             | 3.3 $\pm$ 0.4            | 3.2 $\pm$ 0.1           |
| M7           | 13.26                | —                                 | 1.6 $\pm$ 1.1                         | 3.9 $\pm$ 1.6           | ND                       | ND                      |
| M9           | 14.53                | —                                 | 2.0 $\pm$ 2.0                         | 7.8 $\pm$ 2.7           | ND                       | ND                      |
| M10          | 14.89                | —                                 | 27.3 $\pm$ 4.6                        | 64.1 $\pm$ 5.3          | 19.3 $\pm$ 1.6           | 53.4 $\pm$ 3.8          |
| M11          | 16.24                | 9-Docosene <sup>†</sup>           | 7.4 $\pm$ 1.5                         | 17.0 $\pm$ 1.1          | 6.5 $\pm$ 0.6            | 16.9 $\pm$ 0.2          |
| M12          | 16.4                 | cis-vaccenyl acetate <sup>†</sup> | 29.8 $\pm$ 18.6                       | 154.8 $\pm$ 23.5        | 48.5 $\pm$ 17.0          | 97.1 $\pm$ 42.1         |
| M13          | 16.57                | —                                 | 37.3 $\pm$ 7.3                        | 55.3 $\pm$ 5.8          | 27.2 $\pm$ 2.1           | 38.1 $\pm$ 0.5          |
| M14          | 17.6                 | 2-Methyltricosane                 | 2.1 $\pm$ 0.4                         | 8.7 $\pm$ 1.3           | 1.5 $\pm$ 0.2            | 4.2 $\pm$ 0.5           |
| M15          | 17.78                | 9-Tricosene <sup>†</sup>          | 32.8 $\pm$ 6.3                        | 22.4 $\pm$ 5.2          | 32.1 $\pm$ 7.2           | 48.7 $\pm$ 3.2          |
| M16          | 17.92                | 7-Tricosene <sup>†</sup>          | 777.3 $\pm$ 177.1                     | 1486.2 $\pm$ 119.7      | 543.6 $\pm$ 47.5         | 1245.0 $\pm$ 31.6       |
| M17          | 18.07                | 5-Tricosene <sup>†</sup>          | 45.2 $\pm$ 9.2                        | 67.7 $\pm$ 3.7          | 27.0 $\pm$ 1.0           | 58.3 $\pm$ 4.0          |
| M18          | 18.22                | n-tricosane <sup>†</sup>          | 345.8 $\pm$ 53.4                      | 385.2 $\pm$ 48.2        | 196.8 $\pm$ 21.3         | 277.9 $\pm$ 28.6        |
| M19          | 19.45                | 7-Tetracosene                     | 29.3 $\pm$ 6.0                        | 26.8 $\pm$ 3.8          | 16.5 $\pm$ 6.5           | 26.7 $\pm$ 0.5          |
| M20          | 19.6                 | 5-Tetracosene                     | 2.4 $\pm$ 0.6                         | 3.8 $\pm$ 0.5           | 1.9 $\pm$ 0.4            | 5.9 $\pm$ 4.4           |
| M21          | 19.8                 | n-tetracosane                     | 13.3 $\pm$ 2.2                        | 13.1 $\pm$ 2.6          | 7.2 $\pm$ 1.1            | 6.8 $\pm$ 0.4           |
| M22          | 20.79                | 2-Methyltetracosane               | 12.2 $\pm$ 3.1                        | 42.9 $\pm$ 6.1          | 5.9 $\pm$ 0.9            | 21.7 $\pm$ 1.9          |
| M23          | 20.98                | 9-Pentacosene <sup>†</sup>        | 108.0 $\pm$ 21.7                      | 63.1 $\pm$ 16.4         | 85.8 $\pm$ 3.7           | 60.3 $\pm$ 3.4          |
| M24          | 21.11                | 7-Pentacosene <sup>†</sup>        | 437.9 $\pm$ 89.4                      | 184.5 $\pm$ 25.1        | 279.3 $\pm$ 10.6         | 209.0 $\pm$ 14.3        |
| M25          | 21.27                | 5-Pentacosene <sup>†</sup>        | 4.8 $\pm$ 0.9                         | 0.9 $\pm$ 0.5           | 3.4 $\pm$ 1.0            | 1.4 $\pm$ 0.1           |
| M26          | 21.38                | n-pentacosane <sup>†</sup>        | 50.6 $\pm$ 7.9                        | 49.8 $\pm$ 12.2         | 18.1 $\pm$ 5.0           | 25.2 $\pm$ 4.0          |
| M30          | 22.9                 | 2-Methylpentacosane               | 5.5 $\pm$ 1.0                         | 3.7 $\pm$ 1.1           | ND                       | ND                      |
| M32          | 23.67                | 2-Methylhexacosane <sup>†</sup>   | 15.4 $\pm$ 15.4                       | 87.6 $\pm$ 31.6         | 12.6 $\pm$ 1.6           | 30.8 $\pm$ 1.3          |
| M33          | 24.03                | —                                 | 3.7 $\pm$ 0.6                         | 6.2 $\pm$ 4.6           | ND                       | ND                      |
| M34          | 24.16                | 7-Heptacosene                     | 39.2 $\pm$ 10.0                       | 9.8 $\pm$ 6.4           | 19.9 $\pm$ 3.3           | 5.1 $\pm$ 0.7           |
| M35          | 24.4                 | n-heptacosane <sup>†</sup>        | 58.7 $\pm$ 10.4                       | 24.6 $\pm$ 6.7          | 13.4 $\pm$ 3.9           | 13.2 $\pm$ 3.2          |
| M38          | 25.83                | —                                 | 5.6 $\pm$ 1.2                         | 1.4 $\pm$ 0.3           | ND                       | ND                      |
| M40          | 26.72                | 2-Methyloctacosane <sup>†</sup>   | 77.5 $\pm$ 16.6                       | 70.7 $\pm$ 21.5         | 15.5 $\pm$ 3.9           | 26.0 $\pm$ 3.0          |
| MF20         | 27.02                | —                                 | 3.4 $\pm$ 0.9                         | 0.8 $\pm$ 0.4           | ND                       | ND                      |
| M41          | 27.24                | n-nonacosane                      | 46.0 $\pm$ 12.2                       | 7.0 $\pm$ 1.1           | 6.8 $\pm$ 1.7            | 4.7 $\pm$ 1.5           |
| MF24         | 28.24                | —                                 | 4.6 $\pm$ 2.3                         | 1.1 $\pm$ 0.3           | ND                       | ND                      |
| M43          | 28.59                | —                                 | 3.4 $\pm$ 1.0                         | 1.3 $\pm$ 1.2           | ND                       | ND                      |
| M45          | 29.42                | 2-Methyltriacontane               | 35.3 $\pm$ 6.6                        | 9.1 $\pm$ 1.3           | 5.5 $\pm$ 1.6            | 4.9 $\pm$ 0.8           |
| M46          | 29.91                | —                                 | 3.7 $\pm$ 2.3                         | 0.4 $\pm$ 0.2           | ND                       | ND                      |
| Total amount |                      |                                   | 2,347.9 $\pm$ 468.1                   | 2,948.1 $\pm$ 335.3     | 1,453.4 $\pm$ 83.2       | 2,360.4 $\pm$ 130.4     |

CHs that were less than 3 ng per sample were omitted from this table. ND, not detectable.

\*Based on the GC CH profiles of *D. melanogaster* (1) and on GC-MS analyses.

<sup>†</sup>Identified by GC-MS.

1. Everaerts C, Farine JP, Cobb M, Ferveur JF (2010) *Drosophila* cuticular hydrocarbons revisited: Mating status alters cuticular profiles. *PLoS ONE* 5:e9607.

**Table S2. CH profiles of untreated and antibiotic-treated CMY and starch bred female flies**

| Peak name    | Retention time (min) | Presumed compound*               | Mean CH per three flies $\pm$ SEM, ng |                       |                          |                       |
|--------------|----------------------|----------------------------------|---------------------------------------|-----------------------|--------------------------|-----------------------|
|              |                      |                                  | No antibiotic treatment               |                       | Treated with antibiotics |                       |
|              |                      |                                  | CMY female (n = 3)                    | Starch female (n = 2) | CMY female (n = 3)       | Starch female (n = 3) |
| F1           | 4.1                  | —                                | 19.6 $\pm$ 4.3                        | 9.8 $\pm$ 3.6         | 32.6 $\pm$ 4.0           | 25.9 $\pm$ 6.7        |
| F2           | 7.02                 | —                                | 6.1 $\pm$ 0.7                         | 5.4 $\pm$ 1.6         | 3.6 $\pm$ 1.3            | 4.5 $\pm$ 2.6         |
| F3           | 8.04                 | —                                | 7.0 $\pm$ 1.3                         | 4.6 $\pm$ 1.2         | 5.7 $\pm$ 0.6            | 6.7 $\pm$ 0.9         |
| IS           | 9.7                  | c-18 internal standard           | 100 $\pm$ 0.0                         | 100 $\pm$ 0.0         | 100 $\pm$ 0.0            | 100 $\pm$ 0.0         |
| F5           | 11.66                | —                                | ND                                    | ND                    | 3.1 $\pm$ 0.2            | 3.6 $\pm$ 0.3         |
| F6           | 12.5                 | —                                | 3.3 $\pm$ 0.5                         | 2.8 $\pm$ 0.0         | ND                       | ND                    |
| F8           | 13.58                | —                                | 0.7 $\pm$ 0.1                         | 1.3 $\pm$ 0.5         | ND                       | ND                    |
| F10          | 14.89                | n-heneicosane                    | 17.3 $\pm$ 3.8                        | 16.6 $\pm$ 0.9        | 8.5 $\pm$ 0.4            | 9.4 $\pm$ 0.1         |
| F13          | 16.57                | n-docosane                       | 29.8 $\pm$ 4.2                        | 25.3 $\pm$ 1.2        | 15.4 $\pm$ 0.3           | 13.4 $\pm$ 1.7        |
| F14          | 17.56                | 2-Methyltricosane                | 16.8 $\pm$ 2.4                        | 25.2 $\pm$ 0.3        | 11.1 $\pm$ 1.6           | 16.8 $\pm$ 1.8        |
| F15          | 17.78                | 9-Tricosene <sup>†</sup>         | 8.8 $\pm$ 2.0                         | 5.0 $\pm$ 0.4         | 6.7 $\pm$ 0.4            | 6.8 $\pm$ 0.5         |
| F16          | 17.92                | 7-Tricosene <sup>†</sup>         | 134.1 $\pm$ 30.4                      | 67.9 $\pm$ 1.6        | 77.3 $\pm$ 6.9           | 48.7 $\pm$ 2.4        |
| F17          | 18.07                | 5-Tricosene <sup>†</sup>         | 7.3 $\pm$ 2.6                         | 2.2 $\pm$ 0.1         | 3.7 $\pm$ 0.5            | 1.8 $\pm$ 0.3         |
| F18          | 18.24                | n-tricosane <sup>†</sup>         | 220.8 $\pm$ 35.0                      | 222.5 $\pm$ 10.6      | 122.8 $\pm$ 7.6          | 112.7 $\pm$ 9.0       |
| FF6          | 19.16                | 7,11-Tetracosadiene              | 2.1 $\pm$ 1.1                         | 3.5 $\pm$ 0.8         | ND                       | ND                    |
| F19          | 19.44                | 7-Tetracosane                    | 13.0 $\pm$ 1.1                        | 7.5 $\pm$ 1.4         | 9.0 $\pm$ 0.6            | 6.4 $\pm$ 0.6         |
| F21          | 19.79                | n-tetracosane                    | 20.1 $\pm$ 01.0                       | 16.8 $\pm$ 1.5        | 12.3 $\pm$ 0.5           | 11.0 $\pm$ 1.9        |
| FF7          | 20.62                | 9,13-Pentacosadiene              | 4.7 $\pm$ 0.7                         | 10.2 $\pm$ 1.1        | 2.9 $\pm$ 0.2            | 4.3 $\pm$ 1.0         |
| F22          | 20.75                | 7,11-Pentacosadiene              | 74.7 $\pm$ 24.0                       | 70.0 $\pm$ 0.4        | 26.6 $\pm$ 3.2           | 30.4 $\pm$ 2.1        |
| F23          | 20.96                | 9-Pentacosene <sup>†</sup>       | 128.1 $\pm$ 16.0                      | 114.5 $\pm$ 17.3      | 89.0 $\pm$ 6.3           | 70.3 $\pm$ 4.1        |
| F24          | 21.08                | 7-Pentacosene <sup>†</sup>       | 111.3 $\pm$ 23.2                      | 33.2 $\pm$ 6.8        | 60.9 $\pm$ 7.4           | 31.6 $\pm$ 2.3        |
| F25          | 21.22                | 5-Pentacosene <sup>†</sup>       | 4.1 $\pm$ 0.8                         | 2.2 $\pm$ 0.4         | 3.4 $\pm$ 0.4            | 1.6 $\pm$ 0.0         |
| F26          | 21.34                | n-pentacosane <sup>†</sup>       | 51.6 $\pm$ 4.4                        | 49.7 $\pm$ 2.8        | 33.0 $\pm$ 3.3           | 34.2 $\pm$ 3.1        |
| F28          | 22.25                | 7,11-Hexacosadiene               | 6.7 $\pm$ 1.2                         | 8.6 $\pm$ 0.6         | 3.2 $\pm$ 0.5            | 3.5 $\pm$ 0.5         |
| F30          | 22.81                | 2-Methylpentacosane              | 5.8 $\pm$ 3.1                         | 8.1 $\pm$ 0.7         | 4.5 $\pm$ 0.2            | 4.2 $\pm$ 0.3         |
| FF12         | 23.77                | 7,11-Heptacosadiene <sup>†</sup> | 352.1 $\pm$ 65.5                      | 516.8 $\pm$ 16.7      | 151.9 $\pm$ 24.3         | 178.3 $\pm$ 26.4      |
| F33          | 23.92                | 9-Heptacosene <sup>†</sup>       | 22.4 $\pm$ 0.5                        | 36.7 $\pm$ 2.9        | 19.4 $\pm$ 1.9           | 20.0 $\pm$ 2.8        |
| F34          | 24.03                | 7-Heptacosene <sup>†</sup>       | 57.7 $\pm$ 3.7                        | 21.8 $\pm$ 5.4        | 44.5 $\pm$ 3.5           | 28.1 $\pm$ 1.0        |
| F35          | 24.26                | n-heptacosane <sup>†</sup>       | 68.2 $\pm$ 14.9                       | 69.6 $\pm$ 4.1        | 26.5 $\pm$ 1.3           | 26.1 $\pm$ 0.7        |
| F36          | 25.14                | 7,11-Nonacosadiene               | 10.2 $\pm$ 0.4                        | 15.4 $\pm$ 1.5        | 4.1 $\pm$ 0.4            | 5.5 $\pm$ 0.6         |
| F38          | 25.64                | —                                | 7.5 $\pm$ 1.7                         | 6.7 $\pm$ 0.6         | ND                       | ND                    |
| F39          | 25.83                | —                                | 1.6 $\pm$ 0.2                         | 2.2 $\pm$ 0.2         | ND                       | ND                    |
| F40          | 26.54                | 2-Methyloctacosane <sup>†</sup>  | 261.5 $\pm$ 7.5                       | 408.5 $\pm$ 12.9      | 102.7 $\pm$ 13.0         | 146.9 $\pm$ 18.2      |
| FF19         | 26.68                | —                                | 2.3 $\pm$ 0.2                         | 3.4 $\pm$ 0.5         | ND                       | ND                    |
| FF20         | 26.79                | 7-Nonacosane                     | 7.4 $\pm$ 0.6                         | 4.1 $\pm$ 0.6         | 3.6 $\pm$ 0.2            | 4.3 $\pm$ 1.9         |
| F41          | 26.99                | n-nonacosane <sup>†</sup>        | 39.6 $\pm$ 12.6                       | 37.9 $\pm$ 2.9        | 9.3 $\pm$ 0.7            | 7.0 $\pm$ 1.7         |
| FF24         | 27.93                | —                                | 5.4 $\pm$ 1.8                         | 3.1 $\pm$ 0.4         | ND                       | ND                    |
| F45          | 29.07                | 2-Methyltriacontane              | 44.1 $\pm$ 11.7                       | 49.1 $\pm$ 8.6        | 13.2 $\pm$ 1.7           | 11.6 $\pm$ 2.7        |
| FF26         | 29.28                | —                                | 1.8 $\pm$ 0.1                         | 2.2 $\pm$ 0.1         | 1.0 $\pm$ 0.1            | 2.2 $\pm$ 1.6         |
| F46          | 29.53                | —                                | 3.7 $\pm$ 1.2                         | 3.0 $\pm$ 0.1         | ND                       | ND                    |
| Total amount |                      |                                  | 1,753.9 $\pm$ 258.7                   | 1,926.8 $\pm$ 82.4    | 937.2 $\pm$ 83.4         | 915.3 $\pm$ 49.2      |

Cuticular hydrocarbons that were less than 3 ng per sample were omitted from this table. ND, not detectable.

\*Based on the GC CH profiles of *D. melanogaster* (1) and on GC-MS analyses.

<sup>†</sup>Identified by GC-MS.

1. Everaerts C, Farine JP, Cobb M, Ferveur JF (2010) *Drosophila* cuticular hydrocarbons revisited: Mating status alters cuticular profiles. *PLoS ONE* 5:e9607.
